# Supplementary material for: Transcriptional profiling of the developing rat ovary following intrauterine exposure to the endocrine disruptors diethylstilbestrol and ketoconazole
Source: PubMed Central journal article supplement (PMC9968686; doi:10.1007/s00204-023-03442-2), 2023-01-18
Supplement: 204_2023_3442_MOESM7_ESM.pdf [file 204_2023_3442_MOESM7_ESM.pdf]

**A**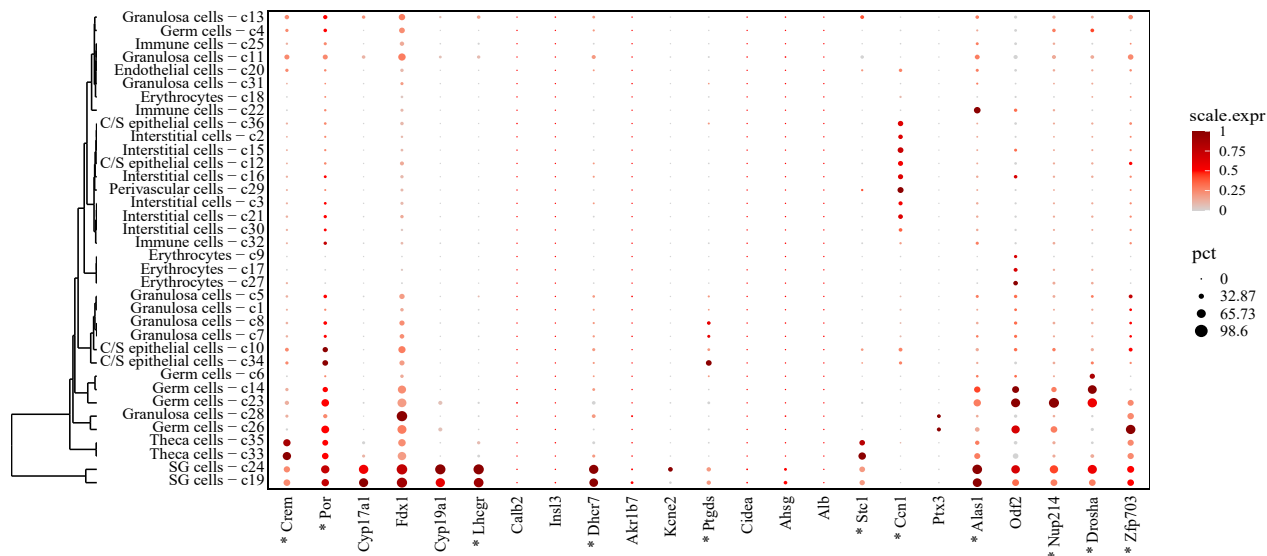**B**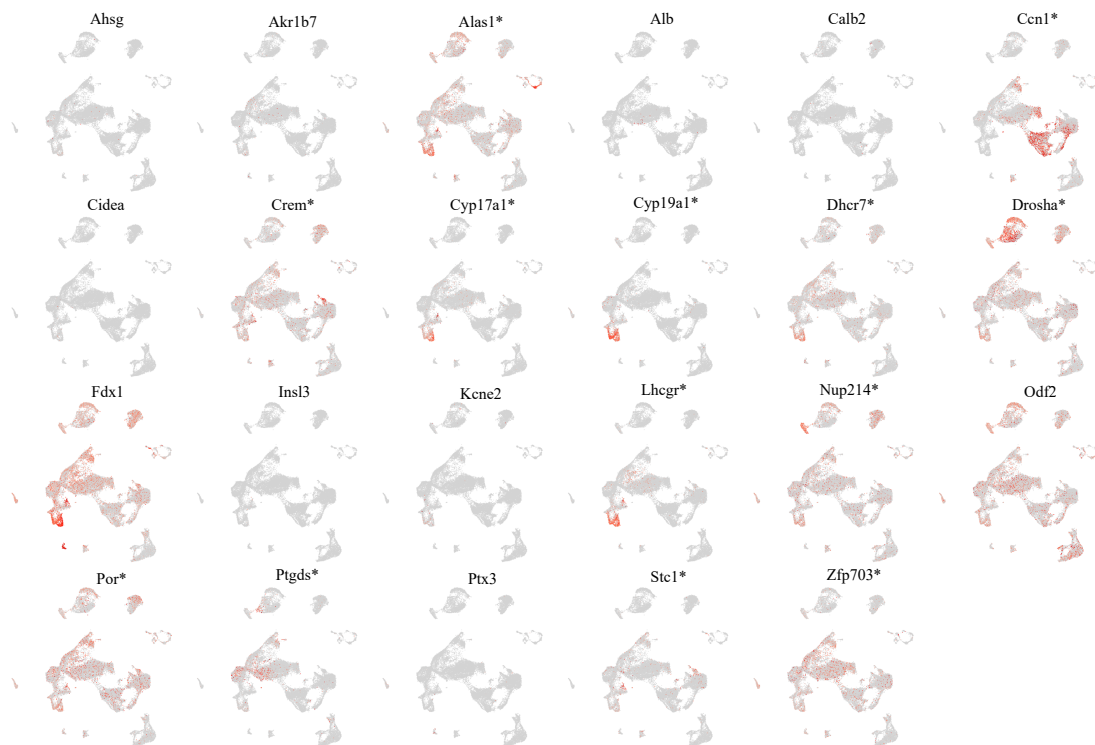**Figure S7**
